# Supplementary material for: Solution-Mediated Modulation of Pseudomonas aeruginosa Biofilm Formation by a Cationic Synthetic Polymer
Source: MDPI journal article supplement (doi:10.3390/antibiotics8020061), 2019-05-10
Supplement: s1 [file s1]

## Supplementary Material

# Solution-Mediated Modulation of *P. aeruginosa* Biofilm Formation by a Cationic Synthetic Polymer

Leanna Foster<sup>1</sup>, Shin-ichi Yusa<sup>2</sup> and Kenichi Kuroda<sup>1,3,\*</sup>

<sup>1</sup> Macromolecular Science and Engineering, University of Michigan, Ann Arbor, MI, 48109; llfoster@umich.edu

<sup>2</sup> Department of Materials Science and Chemistry, University of Hyogo, 2167 Shosha, Himeji, Hyogo 671-2280, Japan; yusa@eng.u-hyogo.ac.jp

<sup>3</sup> Department of Biologic and Materials Sciences & Prosthodontics, School of Dentistry, University of Michigan, Ann Arbor, MI 48109; [kkuroda@umich.edu](mailto:kkuroda@umich.edu)

\* Correspondence: [kkuroda@umich.edu](mailto:kkuroda@umich.edu)

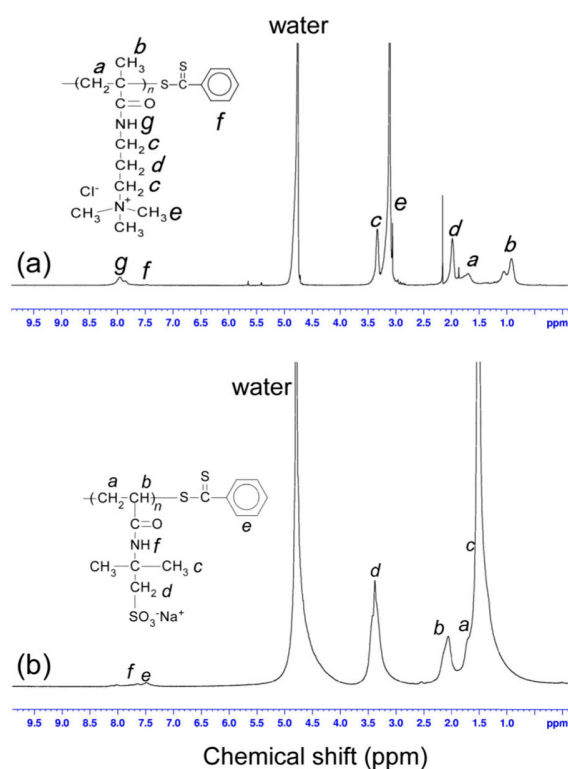

**Figure S1.** <sup>1</sup>H NMR spectra for (a) P-1 and (b) P-2 in D<sub>2</sub>O. The <sup>1</sup>H NMR spectra were obtained with Bruker DRX-500.

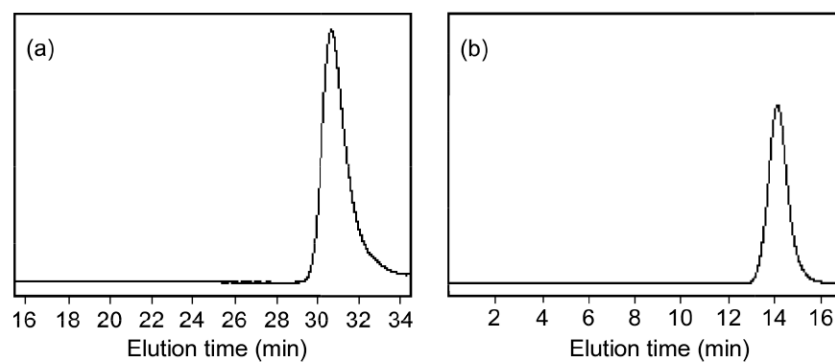

**Figure S2.** GPC elution curves for (a) P-1 using two Shodex Ohpak SB-804 HQ columns and a 0.3 M  $\text{Na}_2\text{SO}_4$  aqueous solution containing 0.5 M acetic acid as an eluent and (b) P-2 using a Shodex Asahipak GF-7M HQ column and a phosphate buffer (pH 9) containing 10 vol% acetonitrile as an eluent.
